# Supplementary material for: A structural bioinformatics investigation on protein–DNA complexes delineates their modes of interaction
Source: Royal Society of Chemistry journal article supplement (doi:10.1039/c7mb00071e), 2017-04-07
Supplement: c7mb00071e1.csv [file c7mb00071e1.csv]

Table S1: Complete list of PDB ID codes of non-redundant 629 structures, which have been used for our studies on the amino acid composition of DNA-protein interfaces.
PDB CLASS SUBCLASS UNIPROT RESOLUTION(Ang) RVALUE(0.) WATER(#)
1k3x DE Endonuclease P50465 1.25 181 9
2vla DE Endonuclease A3FMN7 1.30 140 23
3ndh DE Endonuclease Q9HJY3 1.30 172 23
4uqm DE glycosylase Q9RWH9 1.35 183 8
5cl8 DE glycosylase Q816E8 1.38 134 12
2nq9 DE Endonuclease P0A6C1 1.45 220 11
2odi DE Endonuclease Q8RNV8 1.45 175 60
4b21 DE Glycosylase(Repair) O94468 1.45 206 9
4z47 DE glycosylase Q13569 1.45 143 8
3zdb DE Endonuclease Q8X6R9 1.47 204 2
1dfm DE Endonuclease(Restr) Q45488 1.50 192 38
2oaa DE Endonuclease Q8RNV5 1.50 177 54
3gox DE Endonuclease Q9ZL26 1.50 170 17
4ecq DE Polymerase Q9Y253 1.50 175 22
4gz1 DE Topoisomerase Q9JJX7 1.50 147 10
4s0n DE repair Q14527 1.50 154 30
3pv8 DE Polymerase Q5KWC1 1.52 186 41
3tan DE Polymerase A0A0J9X1I4 1.53 170 13
4opj DE Endonuclease Q9KEI9 1.54 167 5
2xhi DE Lyase(Repair) O15527 1.55 231 8
4ofa DE Glycosylase(Repair) O95243 1.55 137 11
4z3c DE dioxygenase K9JJH7 1.57 216 6
3pvi DE Endonuclease P23657 1.59 205 25
1eon DE Endonuclease(Restr) P04390 1.60 229 28
1fiu DE Endonuclease(Restr) P31032 1.60 173 60
1t9i DE Endonuclease P05725 1.60 194 62
2p2r DE PolyC Q15366 1.60 207 2
2py5 DE Polymerase P03680 1.60 165 36
4kli DE Polymerase P06746 1.60 188 24
2ih2 DE Methyltransferase P14385 1.61 162 60
3rzg DE Dioxygenase Q6NS38 1.62 202 12
1r2z DE Glycosylase(Repair) P84131 1.63 208 10
2bcq DE Polymerase Q9UGP5 1.65 201 31
3m4a DE Topoisomerase Q9RWH8 1.65 195 12
1d02 DE Endonuclease(Restr) P43642 1.70 180 22
1dc1 DE Endonuclease(Restr) P70985 1.70 190 35
1f0v DE Endonuclease(RNase) P61823 1.70 184 12
1jx4 DE Polymerase Q97W02 1.70 213 36
1oj8 DE Endonuclease(RNase) Q9DFY5 1.70 229 1
1rff DE Repair Q9NUW8 1.70 194 19
1rh6 DE Excisionase P03699 1.70 193 7
2c7p DE Methyltransferase P05102 1.70 196 26
2gb7 DE Endonuclease O87963 1.70 208 19
2voa DE Endonuclease O29675 1.70 198 5
2z70 DE Ribonuclease P21338 1.70 194 0
3bm3 DE Endonuclease O93646 1.70 171 28
3ht3 DE Polymerase Q9UNA4 1.70 211 26
3v9w DE Exonuclease P30014 1.70 194 24
3qex DE Polymerase Q38087 1.73 180 30
4b9s DE Polymerase E1C9K5 1.73 182 11
4fpv DE Repair Q5XJA0 1.73 159 12
4mdf DE Repair A3DJ38 1.73 166 12
3g00 DE Endonuclease O26314 1.74 170 23
3kde DE Transposase Q7M3K2 1.74 179 6
3oqg DE Endonuclease Q9KJ88 1.75 166 20
4yd1 DE Polymerase Q9NP87 1.75 164 26
1brn DE Endonuclease(RNase) P00648 1.76 190 0
1a73 DE Endonuclease Q94702 1.80 208 33
1emh DE Glycosylase(Repair) P13051 1.80 216 8
1lau DE Glycosylase(Repair) P10186 1.80 174 5
1m07 DE Endonuclease(RNase) P11916 1.80 189 17
1sxq DE Glucosyltransferase P04547 1.80 183 21
1tdz DE Glycosylase(Repair) P42371 1.80 180 14
1tez DE Photolyase P05327 1.80 205 27
2bdp DE Polymerase P52026 1.80 241 18
2dp6 DE Glycosylase(Repair) Q5SJ65 1.80 204 7
2hhs DE Polymerase Q45458 1.80 218 7
2wiw DE Resolvase O28314 1.80 174 2
3bam DE Endonuclease P23940 1.80 226 24
3i0x DE Glycosylase(Repair) Q97FM4 1.80 187 4
3q23 DE Polymerase Q859P9 1.80 201 53
4zsf DE Endonuclease Q6UQ65 1.80 156 3
5a3d DE Repair P28519 1.80 211 5
2ofi DE Glycosylase(Repair) Q8Z2A5 1.85 177 4
4ndh DE Repair Q7Z2E3 1.85 164 19
3sm4 DE Exonuclease P03697 1.88 161 24
2g1p DE Methyltransferase P0AEE8 1.89 188 20
3dvo DE Endonuclease Q9F6L0 1.89 221 58
1mus DE Transposase Q46731 1.90 193 18
1wte DE Endonuclease(Restr) Q9RPJ3 1.90 173 31
1y8z DE Glucosyltransferase P04519 1.90 208 8
2h7g DE Topoisomerase P32989 1.90 199 25
2i5s DE Onconase P22069 1.90 181 0
2ve9 DE Translocase Q9I0M3 1.90 199 53
2xo6 DE Transposase O83028 1.90 180 52
3aaf DE Helicase Q14191 1.90 213 15
3osn DE Polymerase Q9UNA4 1.90 210 13
4i2a DE nucleotidylexotransferase P09838 1.90 178 2
4lvi DE Relaxases P13925 1.90 208 21
3bep DE Polymerase P0A988 1.92 210 1
3k59 DE Polymerase P21189 1.92 198 10
3m7k DE Endonuclease D5MNX7 1.92 173 9
4p4m DE Polymerase Q9U6N3 1.92 165 14
1omh DE Relaxases Q47673 1.95 246 29
1sa3 DE Endonuclease P11405 1.95 223 27
2oxv DE Endonuclease P00642 1.95 202 9
4jrp DE Exonuclease P04995 1.95 215 22
4yoy DE Exonuclease A0A060P168 1.95 181 10
4lox DE Endonuclease F7WD42 1.98 191 17
1oe4 DE Glycosylase(Repair) Q9YGN6 2.00 179 8
1rxw DE Endonuclease O29975 2.00 242 2
1uut DE Endonuclease Q9YJC1 2.00 195 7
2aor DE Nuclease P44688 2.00 196 21
2dnj DE Nuclease P00639 2.00 174 10
2e52 DE Endonuclease P43870 2.00 177 82
3cvu DE Photolyase Q8SXK5 2.00 185 7
3iay DE Polymerase P15436 2.00 195 20
3vk8 DE Glycosylase(Repair) Q5UQ00 2.00 200 24
4b5f DE Exonuclease Q7DD47 2.00 182 16
4ejy DE Glycosylase(Repair) Q8R5T9 2.00 224 13
4pw7 DE Ligase Q96PU4 2.00 166 41
4qen DE methyltransferase Q8GZB6 2.00 178 9
4qeo DE methyltransferase X2 2.00 188 6
2vtb DE Lyase Q84KJ5 2.01 185 0
2kfn DE Polymerase P00582 2.03 214 0
1i7d DE Topoisomerase P14294 2.05 233 0
2vs7 DE Endonuclease P21505 2.05 189 0
3kqn DE Multi Q9WMX2 2.05 190 0
4cis DE Glycosylase(Repair) Q031W6 2.05 215 0
4esj DE Endonuclease P0A460 2.05 199 0
1ewn DE Glycosylase(Repair) P29372 2.10 230 0
1k82 DE Glycosylase(Repair) P05523 2.10 214 0
1wb9 DE Repair P23909 2.10 190 0
1x9m DE Polymerase X2 2.10 213 0
2p0j DE Endonuclease Q84AF2 2.10 199 0
2w36 DE Endonuclease Q9X2H9 2.10 217 0
2xcs DE Topoisomerase X2 2.10 183 0
3o9x DE Topoisomerase P07445 2.10 181 0
3ssc DE Endonuclease P15005 2.10 197 0
3zh2 DE Dehydrogenase Q76NM3 2.10 208 0
4q0w DE Repair P07276 2.10 186 0
4bxo DE Repair Q8IYD8 2.15 206 0
4dkj DE methyltransferase Q8EVR5 2.15 178 0
4flw DE Polymerase P0CL77 2.15 170 0
4pzi DE methyltransferase Q9UMN6 2.15 228 0
3qx3 DE Topoisomerase Q02880 2.16 170 0
1a1v DE Helicase P27958 2.20 228 0
1dmu DE Endonuclease(Restr) O68557 2.20 177 0
1i3j DE Endonuclease P13299 2.20 215 0
1kbu DE Recombinase P06956 2.20 231 0
1noy DE Polymerase P04415 2.20 222 0
2ex5 DE Endonuclease P32761 2.20 219 0
2is6 DE Helicase P03018 2.20 210 0
2xrz DE Lyase(Repair) Q8PYK9 2.20 170 0
3dsd DE Repair Q8U1N9 2.20 202 0
3khc DE Dioxygenase(Repair) P05050 2.20 214 0
3n1i DE Repair D9J034 2.20 230 0
3ngo DE Exonuclease Q96LI5 2.20 217 0
3q0b DE methyltransferase O82175 2.20 218 0
3q8k DE Endonuclease P39748 2.20 170 0
3v1z DE Endonuclease Q8RT53 2.20 232 0
4a15 DE Helicase Q9HM14 2.20 195 0
4dav DE Nuclease Q8U1K8 2.20 242 0
4m8o DE Polymerase P21951 2.20 183 0
4noe DE Repair Q9RY80 2.20 192 0
5dpk DE glycosylase P83847 2.20 243 0
1jko DE Invertase P03013 2.24 244 0
1m5x DE Endonuclease C0JWR6 2.25 219 0
2hhx DE Polymerase Q5KWC1 2.26 209 0
2b9s DE Topoisomerase Q9GPZ9 2.27 233 0
3s6i DE Glycosylase(Repair) Q92383 2.28 187 0
3u3y DE Exonuclease Q91XB0 2.28 216 0
4k8x DE Polymerase Q56366 2.28 198 0
1yf3 DE Methyltransferase P04392 2.29 214 0
4k8z DE Polymerase D0VWU9 2.29 183 0
1cw0 DE Endonuclease(Repair) P09184 2.30 204 0
1oup DE Endonuclease Q7MHK3 2.30 191 0
1qai DE Polymerase(RT) P03355 2.30 233 0
2fcc DE Endonuclease P04418 2.30 249 0
2owo DE Ligase(Repair) P15042 2.30 217 0
3cws DE Glycosylase(Repair) P04395 2.30 221 0
4fzx DE Endonuclease P0AEK0D 2.30 184 0
4oww DE Repair Q68E01 2.30 182 0
2aq4 DE Polymerase P12689 2.32 199 0
4ir9 DE Polymerase Q47155 2.33 214 0
4f4y DE Polymerase Q4JB80 2.34 223 0
1mwi DE Glycosylase(Repair) P0A9H1 2.35 210 0
3b39 DE Primase P0ABS5 2.35 214 0
3szq DE Ligase O74859 2.35 165 0
4kyw DE Endonuclease P0A459 2.35 202 0
4lez DE Synthase Q8C6L5 2.36 195 0
5ean DE helicase/nuclease Q6ZQJ5 2.36 209 0
2fkc DE Endonuclease Q5I6E6 2.39 222 0
1cez DE Polymerase P00573 2.40 224 0
1iaw DE Endonuclease P50187 2.40 243 0
1v15 DE Endonuclease P09883 2.40 246 0
2ezv DE Endonuclease O52512 2.40 224 0
2ihm DE Polymerase Q9JIW4 2.40 230 0
2qoj DE Endonuclease P03880 2.40 219 0
3gna DE Endonuclease P15919 2.40 238 0
3qqy DE Endonuclease Q4VWW5 2.40 191 0
4mky DE Repair P9WNV2 2.40 200 0
4tmu DE Helicase A7MQK9 2.40 181 0
5co8 DE Resolvase G0RYN2 2.40 240 0
1rrc DE Repair P06855 2.46 233 0
3v72 DE Polymerase P06766 2.49 223 0
1jey DE Repair X2 2.50 218 0
1zns DE Endonuclease Q47112 2.50 241 0
3c25 DE Endonuclease Q2I6W2 2.50 226 0
3e54 DE Endonuclease Q6L703 2.50 231 0
3gpl DE Helicase Q9RT63 2.50 232 0
3gqc DE Polymerase Q9UBZ9 2.50 219 0
3mx4 DE Endonuclease Q46944 2.50 214 0
3pov DE Exonuclease P88925 2.50 209 0
3ubt DE methyltransferase P20589 2.50 184 0
3zvk DE Ribonuclease X2 2.50 174 0
5a74 DE Endonuclease P56347 2.50 191 0
3hqf DE Endonuclease O69414 2.51 191 0
3qe9 DE Exonuclease Q9UQ84 2.51 215 0
3ebc DE Repair P17743 2.55 195 0
4u6p DE Polymerase Q9UBT6 2.59 201 0
3ei2 DE Repair X2 2.60 223 0
3hqg DE Endonuclease P14633 2.60 242 0
4er8 DE Transposase Q47152 2.60 228 0
4n0o DE Replicase P19811 2.65 247 0
4qqw DE CRISPR Q47PJ0 2.66 174 0
4lq0 DE Endonuclease E0YCK3 2.68 200 0
4zyd DE methyltransferase Q97VW7 2.68 216 0
1u78 DE Transposase P34257 2.69 235 0
4plb DE Topoisomerase P0A0K8 2.69 179 0
1fw6 DE Repair Q56215 2.70 218 0
3auo DE Polymerase Q5SJ64 2.70 244 0
3knt DE Glycosylase(Repair) Q58134 2.70 190 0
3r7p DE Endonuclease C7SWF3 2.70 196 0
3thx DE Repair X2 2.70 212 0
4gle DE Endonuclease Q4J9T1 2.70 195 0
4hdv DE damage Q9UTN9 2.70 218 0
4rdm DE Endonuclease Q5F9M9 2.70 222 0
4w9m DE Endonuclease Q9X1X1 2.70 218 0
4xqk DE Endonuclease A0A0M3KL05 2.70 221 0
4yig DE glycosylase P20536 2.70 182 0
5dqz DE CRISPR X2 2.70 199 0
2a0i DE Endonuclease P14565 2.72 215 0
2o8b DE Repair P43246 2.75 245 0
2vwj DE Polymerase P56689 2.78 229 0
1fok DE Endonuclease(Restr) P14870 2.80 214 0
1m6x DE Recombinase P03870 2.80 239 0
2bgw DE Endonuclease Q9YC15 2.80 225 0
3sz5 DE Exonuclease C1D7P6 2.80 196 0
3twm DE Glycosylase(Repair) O80358 2.80 225 0
4cei DE Helicase/Nuclease P23478 2.80 197 0
4oin DE Polymerase X6 2.80 208 0
4p0p DE Endonuclease X2 2.80 223 0
4z1x DE Endonuclease A5J036 2.80 176 0
2qsh DE Repair P14736 2.81 211 0
4nw3 DE methyltransferase Q03164 2.82 221 0
4e54 DE Repair X2 2.85 235 0
4lt5 DE Dioxygenase D2W6T1 2.89 194 0
4par DE Endonuclease B0VN39 2.89 193 0
4pe8 DE Exonuclease P27859 2.89 199 0
4qcb DE glycosylase P04303 2.89 218 0
2wwy DE Helicase P46063 2.90 200 0
3k9f DE Topoisomerase X2 2.90 187 0
3pih DE Repair Q9WYV0 2.90 201 0
4a8s DE Polymerase P11124 2.90 217 0
4ail DE Polymerase P61875 2.90 228 0
4fm9 DE Topoisomerase P11388 2.90 229 0
4rul DE Topoisomerase P06612 2.90 212 0
4ht4 DE Nicking Q53632 2.91 232 0
1u3e DE Endonuclease P34081 2.92 216 0
3vd0 DE Repair O15350 2.95 235 0
4wzw DE Repair Q15397 2.95 226 0
4xvk DE Polymerase Q7Z5Q5 2.95 223 0
4tyn DE Helicase P15424 2.96 199 0
3k4x DE Polymerase(CLAMP) P0A6R3 2.98 226 0
1gdt DE Resolvase P03012 3.00 235 0
1tau DE Polymerase P19821 3.00 244 0
1uaa DE Helicase P09980 3.00 228 0
1x9n DE Ligase P18858 3.00 236 0
1z63 DE ATPase Q97XQ7 3.00 233 0
2ihn DE Endonuclease P13319 3.00 225 0
2p6r DE Helicase P0DMI1 3.00 232 0
2qnf DE Endonuclease P13340 3.00 246 0
3l2p DE Ligase P49916 3.00 235 0
3pt6 DE methyltransferase P13864 3.00 213 0
3waz DE Glycosylase(Repair) Q9V2B6 3.00 170 0
4wx9 DE methyltransferase P9WJW5 3.00 197 0
4m9v TF ZincCoordinating Q8C6P8 0.97 131 51
4lup TF other Q0P6M2 1.20 147 12
2hax TF other P41016 1.29 132 13
1mnn TF Sheet P38830 1.40 195 23
4x9j TF ZincCoordinating P18146 1.41 174 20
4hly TF other Q77Q82 1.48 198 8
1dp7 TF HTH P22670 1.50 192 12
2r1j TF HTH P69202 1.53 204 13
4ix7 TF other Q8SYK5 1.58 191 46
3bs1 TF Sheet Q8NMG3 1.60 197 10
4hc9 TF ZincCoordinating P23771 1.60 181 9
4xrm TF other O14770 1.60 177 22
3g9m TF other P06536 1.61 188 12
3d2w TF other Q921F2 1.65 210 0
1l3l TF HTH P33905 1.66 246 48
1dsz TF ZincCoordinating X2 1.70 198 22
1h6f TF Sheet O15119 1.70 200 33
1zs4 TF HTH P03042 1.70 209 25
2bop TF Alpha/Beta P03122 1.70 201 3
2wbs TF ZincCoordinating Q60793 1.70 202 8
3rkq TF other P52952 1.70 211 8
5d8k TF other Q03933 1.73 153 6
2c62 TF other P53999 1.74 229 10
2o4a TF HTH Q01826 1.75 245 2
3fdq TF other P0DJO8 1.75 217 9
4i2o TF other O69245 1.77 185 27
2es2 TF other P06601 1.78 190 3
1nkp TF HLH P01106 1.80 219 33
1qna TF Sheet P28147 1.80 193 17
3e6c TF Alpha/Beta B8FW11 1.80 219 6
4g92 TF other P87249 1.80 158 31
4jcy TF other Q32WH4 1.80 148 24
2w7n TF HTH P03052 1.85 172 24
4aik TF HTH B1JJ73 1.85 199 5
4gjr TF other Q3ZD72 1.85 200 38
4rdu TF other P56178 1.85 185 19
3l2c TF other P98177 1.87 195 13
4l5r TF other Q9R002 1.87 193 14
1puf TF HTH P09631 1.90 233 25
1tro TF HTH P0A881 1.90 167 33
2a07 TF HTH O15409 1.90 222 36
2hos TF HTH P02836 1.90 225 12
2nll TF ZincCoordinating P19793 1.90 206 22
3qmd TF ZincCoordinating Q9P0U4 1.90 225 4
4hn5 TF other P04150 1.90 209 13
4roc TF other X2 1.90 187 16
2han TF ZincCoordinating P20153 1.95 182 27
3cmy TF other P23760 1.95 174 18
4uno TF other P41161 1.95 174 12
2i13 TF ZincCoordinating Q07230 1.96 203 52
4h0e TF other P96711 1.97 221 17
3vd6 TF ZincCoordinating P17679 1.98 220 12
1gd2 TF HLH Q01663 2.00 230 30
1jgg TF HTH P06602 2.00 229 4
1yo5 TF HTH O95238 2.00 205 14
2d5v TF HTH A4II00 2.00 245 21
3iag TF other P31266 2.00 199 2
3osg TF other Q58HP3 2.00 193 35
3vok TF other Q9CHR1 2.00 204 0
3zp5 TF other Q99581 2.00 211 7
2xsd TF other P21952 2.05 197 0
1ais TF Sheet X2 2.10 212 0
1dux TF HTH P19419 2.10 202 0
1fyl TF other P22121 2.10 213 0
1mjo TF other P0A8U6 2.10 189 0
1nvp TF Sheet P20206 2.10 229 0
1pue TF HTH P17433 2.10 225 0
1u8b TF helix P06134 2.10 235 0
2e1c TF HTH O59188 2.10 206 0
2vy1 TF other Q00958 2.10 225 0
3gfi TF HTH Q96ZY1 2.10 234 0
3qws TF other Q37964 2.10 211 0
3s8q TF other Q8GGH0 2.10 160 0
4is1 TF ZincCoordinating O75362 2.10 239 0
4qtj TF other Q5AP80 2.10 208 0
1je8 TF HTH P0AF28 2.12 228 0
1awc TF HLH X2 2.15 211 0
3lap TF other P9WPY9 2.15 185 0
3p57 TF other Q02078 2.19 225 0
4lg0 TF other Q12778 2.19 197 0
1ig7 TF HTH P13297 2.20 205 0
1jnm TF HLH P05412 2.20 228 0
1n6j TF Alpha/Beta Q02080 2.20 243 0
1qrv TF helix Q05783 2.20 238 0
1r71 TF helix P07674 2.20 198 0
2a66 TF ZincCoordinating O00482 2.20 196 0
2cgp TF HTH P0ACJ8 2.20 237 0
2dgc TF HLH P03069 2.20 214 0
2irf TF HTH P23906 2.20 202 0
2x6v TF other Q99593 2.20 198 0
3igm TF other Q8IKH2 2.20 217 0
3jtg TF other Q3UPW2 2.20 234 0
4hqu TF other P01127 2.20 227 0
4lmg TF other Q08957 2.20 192 0
4mhg TF other P97360 2.20 177 0
3brd TF Sheet X2 2.21 211 0
3g73 TF other Q08050 2.21 206 0
4hf1 TF other P0AGK8 2.22 205 0
1h8a TF HLH X2 2.23 245 0
1bg1 TF Alpha/Beta P42227 2.25 246 0
1k78 TF HTH Q02548 2.25 227 0
1mnm TF Alpha/Beta P11746 2.25 240 0
2c9l TF HLH P03206 2.25 231 0
2rbf TF Ribbon/Helix/Helix P09546 2.25 208 0
4r24 TF HTH G2RUZ1 2.25 217 0
3ikt TF HTH Q72I39 2.26 234 0
4csa TF ZincCoordinating Q8QN58 2.28 195 0
1a6y TF ZincCoordinating P20393 2.30 192 0
1am9 TF HLH P36956 2.30 219 0
1au7 TF HLH P10037 2.30 230 0
1bl0 TF HLH P0ACH5 2.30 225 0
1lq1 TF HTH P06534 2.30 217 0
2geq TF ZincCoordinating P02340 2.30 202 0
2h27 TF HTH P0AGB6 2.30 241 0
2h7h TF HLH P05411 2.30 224 0
2wt7 TF HLH P01101 2.30 229 0
4hqe TF other A0A0H3JWI0 2.30 208 0
4bhk TF other Q94IF5 2.32 198 0
3wts TF other Q03347 2.35 249 0
5d5w TF other G0SB31 2.35 217 0
4cyc TF other P83949 2.36 212 0
1hcq TF ZincCoordinating P03372 2.40 204 0
1jj4 TF Alpha/Beta P06790 2.40 210 0
1ozj TF ZincCoordinating P84022 2.40 210 0
1r8e TF Alpha/Beta P39075 2.40 227 0
2c6y TF HTH Q01167 2.40 233 0
2ram TF Sheet Q04207 2.40 213 0
3coq TF ZincCoordinating P04386 2.40 213 0
3h0d TF other C3W947 2.40 213 0
3ket TF HTH Q8E565 2.40 198 0
3u2b TF other Q06831 2.40 238 0
3u3w TF HTH X2 2.40 182 0
4f6m TF other Q86T24 2.40 223 0
4h10 TF HLH O00327 2.40 198 0
4ux5 TF HTH L7I1M8 2.40 231 0
5bpd TF HTH Q8U3H1 2.40 236 0
9ant TF HTH P02833 2.40 218 0
3m9e TF other P18113 2.41 182 0
2h1k TF HTH P70118 2.42 227 0
3vwb TF HTH P0A247 2.42 237 0
1h89 TF HTH X2 2.45 229 0
1pp7 TF HTH Q95VR4 2.45 197 0
2bnw TF other Q57468 2.45 227 0
3tq6 TF other Q00059 2.45 183 0
1bdt TF other P03050 2.50 236 0
1gxp TF helix P0AFJ5 2.50 247 0
1hwt TF ZincCoordinating P0CS82 2.50 246 0
1pdn TF HTH P06601 2.50 234 0
1qpi TF HTH P0ACT4 2.50 244 0
1qpz TF HTH P0ACP7 2.50 183 0
1rm1 TF Sheet P13393 2.50 186 0
1skn TF helix P34707 2.50 240 0
1ubd TF ZincCoordinating P25490 2.50 212 0
1vtn TF other P55318 2.50 211 0
1xbr TF Sheet P24781 2.50 215 0
1yrn TF HTH P0CY10 2.50 225 0
1zme TF ZincCoordinating P25502 2.50 208 0
2or1 TF HTH P16117 2.50 179 0
2ql2 TF HLH P15806 2.50 248 0
2yvh TF helix Q8NMG3 2.50 222 0
3c2i TF Alpha/Beta P51608 2.50 215 0
3cro TF HTH P03036 2.50 220 0
3us0 TF ZincCoordinating Q9H3D4 2.50 208 0
4bqa TF other P15036 2.50 234 0
4izz TF other Q2ACK9 2.50 185 0
4jl3 TF other A0R6I8 2.50 224 0
4l0y TF other X2 2.50 225 0
4mtd TF ZincCoordinating P0AC51 2.50 236 0
6pax TF HTH P26367 2.50 233 0
3d1n TF other Q14863 2.51 212 0
4kfc TF other P21866 2.53 208 0
4qgu TF other Q16666 2.54 239 0
2ypf TF other Q3ZD73 2.55 238 0
3lsr TF other Q9HUS3 2.55 229 0
5d5v TF other Q00613 2.55 192 0
1b01 TF HTH P13920 2.56 247 0
4a04 TF other O43435 2.58 207 0
1cf7 TF HLH X2 2.60 223 0
1gt0 TF other X2 2.60 232 0
1svc TF other P19838 2.60 225 0
2a6o TF other Q933Z0 2.60 209 0
2gli TF ZincCoordinating P08151 2.60 228 0
3zhm TF other O48503 2.60 200 0
4ati TF HLH Q08874 2.60 230 0
4rb3 TF other V6F4Q0 2.60 234 0
4m8b TF other P38867 2.61 198 0
1jfi TF other X3 2.62 233 0
1z9c TF HTH O34777 2.64 216 0
1c9b TF other X2 2.65 229 0
4cja TF Editing(HLH) E5AV36 2.65 206 0
3dnv TF HTH X2 2.68 228 0
1bvo TF other Q17034 2.70 219 0
1cit TF ZincCoordinating P22829 2.70 219 0
1kb6 TF other P11473 2.70 223 0
1r8d TF HTH P71039 2.70 234 0
1xsd TF other P0A042 2.70 230 0
2as5 TF other Q13469 2.70 238 0
2fio TF HTH P03682 2.70 229 0
2uzk TF other O43524 2.70 242 0
3kmp TF ZincCoordinating P70340 2.70 208 0
4bhm TF other G4NEJ8 2.70 187 0
4nhj TF other A6T8N1 2.70 222 0
3qsv TF ZincCoordinating P97471 2.71 215 0
3f27 TF other Q61473 2.75 243 0
4iuf TF other Q13148 2.75 212 0
4euw TF other P48436 2.77 248 0
4iri TF other P11308 2.77 191 0
1a0a TF HLH P07270 2.80 230 0
1nwq TF HLH P05554 2.80 221 0
1rzr TF HTH P46828 2.80 242 0
1sax TF HTH P68261 2.80 216 0
1xpx TF other P29617 2.80 217 0
2drp TF ZincCoordinating P17789 2.80 193 0
2o61 TF other Q04206 2.80 245 0
2zhg TF other P0ACS2 2.80 243 0
3l1p TF other P20263 2.80 226 0
3mlp TF ZincCoordinating Q07802 2.80 207 0
3qrf TF other Q13469 2.80 248 0
3zpl TF other Q9KYU1 2.80 176 0
4wlw TF HTH P0A9G4 2.80 212 0
4yrv TF other P27709 2.80 206 0
4lln TF HTH Q5Y812 2.84 208 0
1gji TF other P16236 2.85 227 0
1odh TF ZincCoordinating P70348 2.85 219 0
2er8 TF other P08638 2.85 237 0
2p5l TF other P17893 2.85 208 0
1imh TF other O94916 2.86 244 0
4eot TF HLH Q8NHW3 2.86 223 0
3jrh TF HTH P0A6R3 2.88 224 0
1an4 TF HLH P22415 2.90 236 0
1bf5 TF other P42224 2.90 227 0
1jt0 TF HTH P0A0N4 2.90 222 0
2vz4 TF HTH P0A4T9 2.90 240 0
3gz6 TF other Q8EFJ3 2.90 178 0
3mzh TF HTH P9WMH3 2.90 248 0
3zqc TF other A2D9X4 2.90 218 0
4bnc TF other P50549 2.90 207 0
4iqr TF other P41235 2.90 239 0
4j19 TF other Q6NT76 2.90 174 0
4l62 TF other Q9I1S1 2.90 200 0
4ldx TF other Q8L7G0 2.90 216 0
4mzr TF ZincCoordinating P04637 2.90 234 0
4wwc TF HTH O34817 2.90 234 0
1fzp TF other P0C1U6 2.95 220 0
3w6v TF other Q9S166 2.95 238 0
3q5f TF HTH P40676 2.96 219 0
3zql TF other Q9AMH9 2.99 211 0
1ddn TF other P0DJL7 3.00 240 0
1dh3 TF HLH Q01147 3.00 218 0
1hjb TF HLH X2 3.00 244 0
1if1 TF other P15314 3.00 242 0
2bsq TF other Q5F882 3.00 213 0
3zkc TF HTH P06533 3.00 242 0
4fth TF other O66551 3.00 245 0
4iht TF HTH O68014 3.00 188 0
4on0 TF HTH Q83TD2 3.00 187 0
5dy0 TF other A0A072Z681 3.00 207 0
3sjm SP Telomeric(HTH) Q15554 1.35 174 12
1c8c SP Packaging P39476 1.45 229 12
1xyi SP Packaging P13123 1.45 214 8
3wpc SP Toll-like Q2EEY0 1.60 186 29
2heo SP Zalpha Q9QY24 1.70 248 16
4kmf SP Zalpha Q7T2M9 1.70 173 9
3vke SP Poly(rC) Q15365 1.77 164 8
1u1r SP Telomeric P09651 1.80 240 12
1zzi SP Maintenance/Protection P61978 1.80 197 9
3kjp SP Telomeres Q9NUX5 1.80 211 4
4ljr SP Maintenance/Protection O25100 1.80 196 6
4r55 SP Chromatin Q97ZE3 1.80 220 1
1jb7 SP Telomeric P29549 1.86 230 24
2ok0 SP kappa A2NHM3 1.89 178 3
1p71 SP Packaging P05514 1.90 246 4
1qzg SP Telomeric O13988 1.90 223 10
2w42 SP silencing O28951 1.90 207 18
3vaj SP Splicing P26368 1.90 195 14
2i0q SP Telomeric P29549 1.91 243 13
1owf SP Bending X2 1.95 232 22
4ou6 SP Replication P0A8J2 1.96 191 7
3f8j SP Maintenance/Protection Q8VDF2 1.99 198 8
5b0z SP Packaging(Hist) X4 1.99 213 23
1sfu SP Zalpha Q9DHS8 2.00 237 15
2ht0 SP Bending P0A6X7 2.00 235 33
3ted SP chromatin P32657 2.00 195 5
3u6y SP chromatin Q9YAX2 2.00 244 0
3zvm SP damage Q9JLV6 2.00 154 5
4rkh SP Maintenance/Protection P50534 2.00 200 18
3oym SP Integrase P14350 2.02 199 0
4gck SP Maintenance/Replication B5XTG2 2.05 218 0
4hp3 SP Maintenance/Protection A0JP82 2.05 217 0
1j1v SP Replication P03004 2.10 229 0
1qbj SP Zalpha P55265 2.10 227 0
3ulp SP SSB Q8I415 2.10 221 0
4qju SP Maintenance/Protection Q99U17 2.16 191 0
1b3t SP Replication P03211 2.20 208 0
2i06 SP Replication P16525 2.20 221 0
3c1b SP Packaging(Hist) X4 2.20 240 0
3clz SP Maintenance/Protection Q96T88 2.20 191 0
5av6 SP Packaging(Hist) X4 2.20 202 0
3rmp SP Integrase Q9Z3B4 2.21 236 0
4jbm SP Maintenance/Protection Q91VJ1 2.22 237 0
1ign SP Telomeric P11938 2.25 219 0
3wpi SP Toll-like Q9EQU3 2.25 223 0
1m19 SP Packaging(Hist) X4 2.30 214 0
2nqb SP Packaging(Hist) X4 2.30 223 0
2vw9 SP SSB O25841 2.30 238 0
3oa6 SP chromatin Q8N5Y2 2.35 229 0
4f43 SP Protelomerase Q7CWV1 2.35 239 0
3wpe SP Toll-like Q5I2M5 2.38 220 0
4tnt SP Maintenance/Protection P08235 2.39 214 0
1jmc SP SSB P27694 2.40 100 0
2ntc SP Replication Q98ZP7 2.40 209 0
3hxo SP Maintenance/Protection P04275 2.40 230 0
3udg SP SSB Q9RY51 2.40 204 0
5cc0 SP Progesterone P06401 2.40 217 0
4gct SP Maintenance/Replication Q9KVD2 2.45 225 0
1eqz SP Packaging(Hist) X4 2.50 219 0
1hlv SP Centromeric P07199 2.50 222 0
2cv5 SP Packaging(Hist) X4 2.50 224 0
3rn5 SP - O14862 2.50 202 0
5byg SP Replication Q89268 2.50 191 0
3vea SP Maintenance/Protection Q8ZG78 2.55 222 0
1f66 SP Packaging(Hist) X4 2.60 193 0
1rep SP - P03856 2.60 213 0
4zq9 SP Replication P03132 2.60 206 0
5f99 SP Packaging(Hist) X4 2.63 175 0
4gcl SP Maintenance/Replication Q1R4V1 2.65 230 0
3wtp SP Packaging(Hist) X4 2.67 231 0
4kgc SP Packaging(Hist) X4 2.69 248 0
2ccz SP Replication P07013 2.70 250 0
3a01 SP Recognition Q9VD99 2.70 234 0
3h25 SP Primase Q52349 2.70 226 0
3vw4 SP Maintenance/Replication Q06B24 2.70 222 0
3h15 SP replication Q5EAW4 2.72 199 0
2a3v SP Integrase O68847 2.80 234 0
3a5u SP SSB Q9AFI5 2.80 240 0
3cmw SP Maintenance/Protection P0A7G6 2.80 214 0
3vdy SP SSB C0SPB6 2.80 232 0
3wkj SP Packaging(Hist) X4 2.80 235 0
4gdf SP Maintenance/Replication P03070 2.80 227 0
3x1s SP Packaging(Hist) X4 2.81 224 0
3x1t SP Packaging(Hist) X4 2.81 212 0
3sqi SP Centromeric Q6CPM4 2.82 196 0
3mky SP segregation(HTH) P62558 2.86 242 0
2bzf SP HLH O75531 2.87 244 0
1zla SP Packaging(Hist) P84233 2.90 222 0
2f8n SP Packaging(Hist) X4 2.90 217 0
3mvd SP Packaging(Hist) X4 2.90 176 0
3qfq SP Maintenance/Protection E2IPT4 2.90 228 0
3vh0 SP Maintenance/Protection P76116 2.90 210 0
1zx4 SP partition Q38420 2.98 248 0
3fmt SP replication P0AFY8 2.98 219 0
1u35 SP Packaging(Hist) X4 3.00 206 0
